# Supplementary material for: RNAseq Analysis of the Response of Arabidopsis thaliana to Fractional Gravity Under Blue-Light Stimulation During Spaceflight
Source: Front Plant Sci. 2019 Nov 26;10:1529. doi: 10.3389/fpls.2019.01529 (PMC6889863; doi:10.3389/fpls.2019.01529)
Supplement: Supplementary file 1 [file DataSheet_1.pdf]

**Supplementary Table 1.** List of the fourteen DEG (adjusted FDR  $q < 0.05$ ) in at least the three lower gravity conditions (microgravity, low  $g$  and Moon  $g$  level, extracted from Figure 2A analyses) as generated by GeneMANIA tool (Cytoscape).

| Name                      | Description                                                                                                                                                                                                             |
|---------------------------|-------------------------------------------------------------------------------------------------------------------------------------------------------------------------------------------------------------------------|
| KIC<br>(AT2G46600)        | Calcium-binding EF-hand family protein [Source:TAIR;Acc:AT2G46600]                                                                                                                                                      |
| AT5G54490                 | pinoid-binding protein 1 [Source:TAIR;Acc:AT5G54490]                                                                                                                                                                    |
| RHL41<br>(AT5G59820)      | C2H2-type zinc finger family protein [Source:TAIR;Acc:AT5G59820]                                                                                                                                                        |
| ATMKK9<br>(AT1G73500)     | MAP kinase kinase 9 [Source:TAIR;Acc:AT1G73500]                                                                                                                                                                         |
| CML38<br>(AT1G76650)      | calmodulin-like 38 [Source:TAIR;Acc:AT1G76650]                                                                                                                                                                          |
| AT3G50800                 | unknown protein, molecular function and cellular component; INVOLVED IN: N-terminal protein myristoylation; BEST Arabidopsis thaliana protein match is: unknown protein (TAIR:AT5G66580.1); [Source:TAIR;Acc:AT3G50800] |
| AT3G46620                 | zinc finger (C3HC4-type RING finger) family protein [Source:TAIR;Acc:AT3G46620]                                                                                                                                         |
| ATERF-1<br>(AT4G17500)    | ethylene responsive element binding factor 1 [Source:TAIR;Acc:AT4G17500]                                                                                                                                                |
| AT-HSFA8<br>(AT1G67970)   | heat shock transcription factor A8 [Source:TAIR;Acc:AT1G67970]                                                                                                                                                          |
| AT4G02540                 | Cysteine/Histidine-rich C1 domain family protein [Source:TAIR;Acc:AT4G02540]                                                                                                                                            |
| ALPHA-DOX1<br>(AT3G01420) | Peroxidase superfamily protein [Source:TAIR;Acc:AT3G01420]                                                                                                                                                              |
| ERF104<br>(AT5G61600)     | ethylene response factor 104 [Source:TAIR;Acc:AT5G61600]                                                                                                                                                                |
| CPuORF24<br>(AT5G45428)   | conserved peptide upstream open reading frame 24 [Source:TAIR;Acc:AT5G45428]                                                                                                                                            |
| VPS28-1<br>(AT4G21560)    | vacuolar protein sorting-associated protein 28 homolog 1 [Source:TAIR;Acc:AT4G21560]                                                                                                                                    |

**Supplementary Figure 1. Subcellular compartments are differently affected in reduced gravity conditions.** Number of DEGs (uncorrected  $p < 0.05$ ) are represented for the five reduced gravity levels versus 1g control highlighting the subcellular compartment associated with those genes (see color code). Note the proportion of unassigned genes (higher than 50%) particularly in the Low  $g$  condition and the plastid-related genes at the Moon  $g$  level.

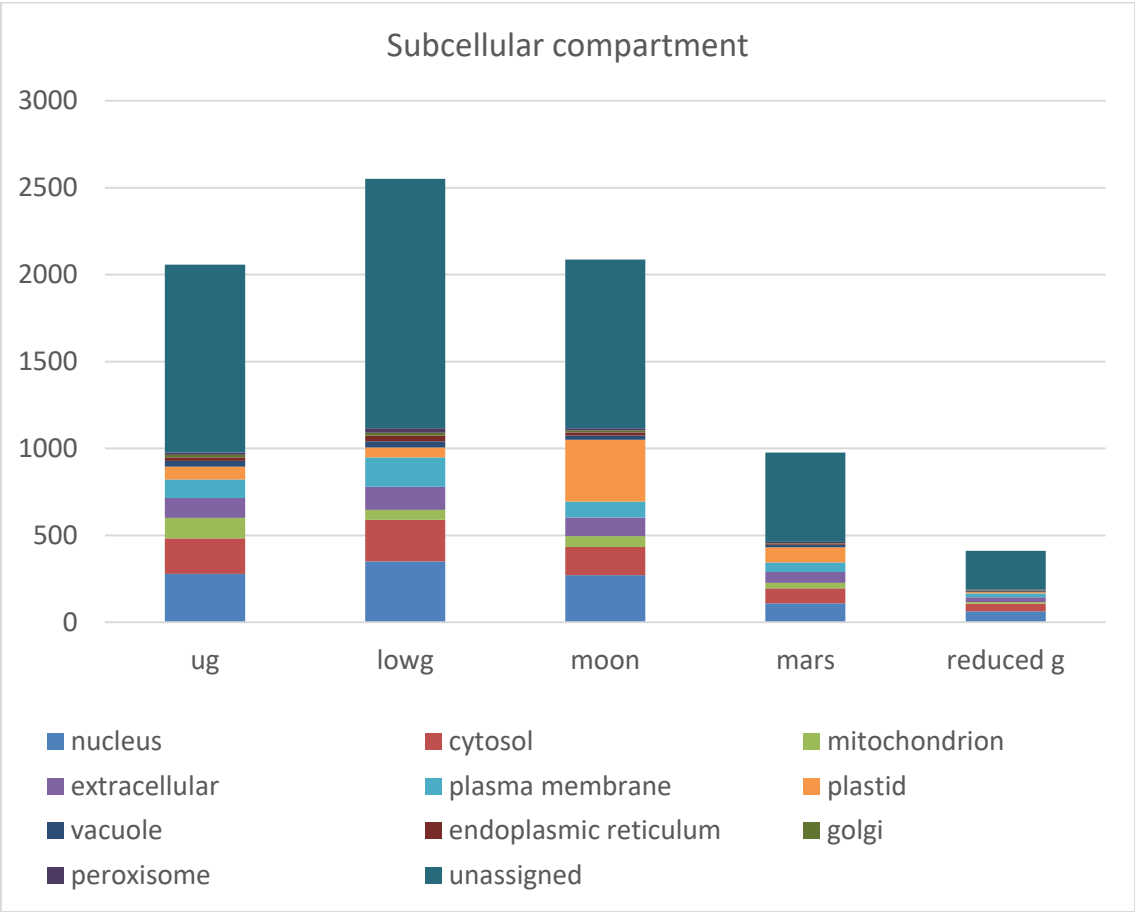

**Supplementary Table 2.** PANTHER-based GO overrepresentation test in the DEGs (FDR  $q < 0.05$ ) reduced gravity samples vs 1g control. Only GO terms with an enrichment raw p-value  $< 0.01$  were listed. A) Cellular component GO subanalysis (a lower raw p $< 0.05$  was accepted at the Moon *g* level upregulated list, in *italics*). B) Biological Process GO subanalysis (additional FDR enrichment p $< 0.05$  was applied in all conditions except the Moon *g* level upregulated list, in *italics*). C) Molecular Function GO subanalysis. D) Genelist used for the GO subanalysis (upregulated and downregulated DEGs (FDR  $q < 0.05$ ) under microg /Lowg / Moon *g* reduced gravity samples vs 1g control).

(ATTACHED AS EXCEL FILE VERSION)

Supplementary Table 3. List of the fifteen DEG (adjusted FDR  $q < 0.05$ ) from upregulated GEDI clusters in all low gravity conditions (extracted from figure 3 analyses) as generated by GeneMANIA tool (Cytoscape). See a graphical representation in figure 4.

| Name                    | Description                                                                                                                                                                                                                                                                 |
|-------------------------|-----------------------------------------------------------------------------------------------------------------------------------------------------------------------------------------------------------------------------------------------------------------------------|
| AT4G21640               | Subtilase family protein [Source:TAIR;Acc:AT4G21640]<br>Related with Peptidase, proteinase inhibitor function                                                                                                                                                               |
| AT4G07868               | unknown protein, molecular function and biological process; LOCATED IN: endomembrane system; [Source:TAIR;Acc:AT4G07868] TM protein domains.<br>Related with expression in siliqua and elongation zone root                                                                 |
| AT5G56380               | F-box/RNI-like/FBD-like domains-containing protein<br>[Source:TAIR;Acc:AT5G56380]                                                                                                                                                                                           |
| AT2G34840               | Coatamer epsilon subunit [Source:TAIR;Acc:AT2G34840]<br>Related with vesicles transport between Golgi-ER                                                                                                                                                                    |
| AT5G56370               | F-box/RNI-like/FBD-like domains-containing protein<br>[Source:TAIR;Acc:AT5G56370]                                                                                                                                                                                           |
| AT3G44430               | unknown protein, molecular function and biological process; LOCATED IN: mitochondrion; EXPRESSED IN: 20 plant structures; EXPRESSED DURING: 13 growth stages; BEST Arabidopsis thaliana protein match is (TAIR:AT5G41660.1); [Source:TAIR;Acc:AT3G44430] TM protein domains |
| AT5G42825               | unknown protein [Source:TAIR;Acc:AT5G42825] Related with mitochondrion                                                                                                                                                                                                      |
| AT2G13660               | unknown protein; [Source:TAIR;Acc:AT2G13660] Related with mitochondrion/nucleus                                                                                                                                                                                             |
| AT1G51430               | unknown protein; BEST Arabidopsis thaliana protein match is (TAIR:AT3G28370.1); [Source:TAIR;Acc:AT1G51430] Related with chloroplast/cytoplasm                                                                                                                              |
| AT5G44980               | F-box/RNI-like/FBD-like domains-containing protein<br>[Source:TAIR;Acc:AT5G44980]                                                                                                                                                                                           |
| AT5G23830               | MD-2-related lipid recognition domain-containing protein<br>[Source:TAIR;Acc:AT5G23830] Related with Expression in the Root apex                                                                                                                                            |
| TPS08<br>(AT4G20210)    | Terpenoid cyclases/Protein prenyltransferases superfamily protein<br>[Source:TAIR;Acc:AT4G20210] Related with Expression in the Root apex and Chloroplast                                                                                                                   |
| AT5G42460               | F-box and associated interaction domains-containing protein<br>[Source:TAIR;Acc:AT5G42460]                                                                                                                                                                                  |
| AT5G47260               | ATP binding;GTP binding;nucleotide binding;nucleoside-triphosphatases<br>[Source:TAIR;Acc:AT5G47260] Related with Defense response / mitochondrion                                                                                                                          |
| CPuORF24<br>(AT5G45428) | conserved peptide upstream open reading frame 24 [Source:TAIR;Acc:AT5G45428]<br>TM protein domains                                                                                                                                                                          |
