# Supplementary material for: RNAseq Analysis of the Response of Arabidopsis thaliana to Fractional Gravity Under Blue-Light Stimulation During Spaceflight
Source: Front Plant Sci. 2019 Nov 26;10:1529. doi: 10.3389/fpls.2019.01529 (PMC6889863; doi:10.3389/fpls.2019.01529)
Supplement: Supplementary file 2 [file DataSheet_2.xlsx]

## Sheet: Table S2 A. Cellular Component
GO Cellular Component UP-regulated in Microgravity	raw P-value	FDR p-value	GO Cellular Component DOWN-regulated in Microgravity	raw P-value	FDR p-value	GO Cellular Component UP-regulated at Low gravity (<0,1g)	raw P-value	FDR p-value	GO Cellular Component DOWN-regulated at Low gravity (<0,1g)	raw P-value	FDR p-value	GO Cellular Component UP-regulated at the Moon gravity	raw P-value	FDR p-value	GO Cellular Component DOWN-regulated at the Moon gravity	raw P-value	FDR p-value
plastid thylakoid membrane (GO:0055035)	2.16e-30	1.17e-27	light-harvesting complex (GO:0030076)	2.41e-10	2.61e-07	cytoplasm (GO:0005737)	0.00265	1	intracellular organelle part (GO:0044446)	9.29e-08	5.04e-05	kinesin complex (GO:0005871)	0.000136	0.148	chloroplast part (GO:0044434)	0.00288	1
chloroplast thylakoid membrane (GO:0009535)	2e-30	2.16e-27	photosystem I (GO:0009522)	1.47e-07	7.95e-05	cytoplasmic part (GO:0044444)	0.0128	1	organelle part (GO:0044422)	7.01e-08	7.6e-05	microtubule associated complex (GO:0005875)	0.000419	0.151	plastid part (GO:0044435)	0.00315	1
photosynthetic membrane (GO:0034357)	9.86e-30	2.67e-27	plastoglobule (GO:0010287)	3.06e-07	0.00011	plastid (GO:0009536)	0.013	1	protein-containing complex (GO:0032991)	3.22e-06	0.00116	monolayer-surrounded lipid storage body (GO:0012511)	0.000362	0.196	etioplast membrane (GO:0034426)	0.0057	1
thylakoid membrane (GO:0042651)	9.16e-30	3.31e-27	photosystem II (GO:0009523)	1.77e-06	0.000479	chloroplast (GO:0009507)	0.0175	1	CCR4-NOT core complex (GO:0030015)	0.000448	0.0971	apoplast (GO:0048046)	0.000783	0.212	etioplast envelope (GO:0034425)	0.0057	1
thylakoid part (GO:0044436)	1.92e-28	4.16e-26	thylakoid light-harvesting complex (GO:0009503)	1.08e-05	0.00167	intracellular organelle part (GO:0044446)	0.0267	1	lipid droplet (GO:0005811)	0.000362	0.0981	lipid droplet (GO:0005811)	0.00117	0.254	organelle (GO:0043226)	0.00595	1		Analysis Type:	PANTHER Overrepresentation Test (Released 20190517)
plastid thylakoid (GO:0031976)	4.43e-27	6.86e-25	PSII associated light-harvesting complex II (GO:0009517)	1.08e-05	0.00195	organelle part (GO:0044422)	0.0267	1	CCR4-NOT complex (GO:0030014)	0.00133	0.18	supramolecular fiber (GO:0099512)	0.00363	0.303	intracellular organelle (GO:0043229)	0.00596	1		Annotation Version and Release Date:	GO Ontology database Released 2019-02-02
chloroplast thylakoid (GO:0009534)	4.17e-27	7.54e-25	photosystem (GO:0009521)	1.03e-05	0.00224	apoplast (GO:0048046)	0.0276	1	storage vacuole (GO:0000322)	0.00118	0.183	polymeric cytoskeletal fiber (GO:0099513)	0.00363	0.328	intracellular membrane-bounded organelle (GO:0043231)	0.00665	1		Analyzed List:	upload_1 (Arabidopsis thaliana)
thylakoid (GO:0009579)	2.36e-26	3.19e-24	nucleus (GO:0005634)	5.53e-05	0.00749	ESCRT I complex (GO:0000813)	0.0305	1	protein storage vacuole (GO:0000326)	0.00118	0.213	supramolecular complex (GO:0099080)	0.00363	0.358	chloroplast (GO:0009507)	0.00897	1		Reference List:	Arabidopsis thaliana (all genes in database)
photosystem (GO:0009521)	6.47e-22	7.79e-20	intracellular membrane-bounded organelle (GO:0043231)	0.000154	0.0185	envelope (GO:0031975)	0.0363	1	phagocytic vesicle (GO:0045335)	0.00402	0.484	microtubule (GO:0005874)	0.00308	0.37	plastid (GO:0009536)	0.00921	1		Test Type:	FISHER
organelle subcompartment (GO:0031984)	1.17e-20	1.27e-18	membrane-bounded organelle (GO:0043227)	0.000214	0.0232	organelle envelope (GO:0031967)	0.0363	1	ribosomal subunit (GO:0044391)	0.00746	0.809	external encapsulating structure (GO:0030312)	0.00522	0.378	membrane-bounded organelle (GO:0043227)	0.00924	1		Correction:	FDR
membrane protein complex (GO:0098796)	1.46e-20	1.44e-18	intracellular part (GO:0044424)	0.000268	0.0242	nuclear speck (GO:0016607)	0.0369	1				cytosol (GO:0005829)	0.00573	0.388
plastid part (GO:0044435)	5.42e-18	4.89e-16	intracellular (GO:0005622)	0.000268	0.0264	1,3-beta-D-glucan synthase complex (GO:0000148)	0.0437	1				non-membrane-bounded organelle (GO:0043228)	0.0029	0.393
chloroplast part (GO:0044434)	1.47e-16	1.23e-14	cell (GO:0005623)	0.000367	0.0284							ribonucleoprotein complex (GO:1990904)	0.00218	0.394
photosystem II (GO:0009523)	1.28e-14	9.91e-13	intracellular organelle (GO:0043229)	0.000407	0.0294							supramolecular polymer (GO:0099081)	0.00363	0.394
photosystem II reaction center (GO:0009539)	4.85e-14	3.51e-12	cell part (GO:0044464)	0.000367	0.0306							cell wall (GO:0005618)	0.00517	0.4
protein-containing complex (GO:0032991)	9.94e-12	6.73e-10	organelle (GO:0043226)	0.000549	0.0372							intracellular non-membrane-bounded organelle (GO:0043232)	0.0029	0.449
membrane part (GO:0044425)	6.99e-10	4.45e-08	chloroplast thylakoid membrane protein complex (GO:0098807)	0.0009	0.0574							microtubule cytoskeleton (GO:0015630)	0.00719	0.458
proton-transporting ATP synthase complex (GO:0045259)	4.93e-09	2.97e-07	plastid thylakoid membrane (GO:0055035)	0.00143	0.0814
membrane (GO:0016020)	6.26e-09	3.57e-07	chloroplast thylakoid membrane (GO:0009535)	0.00141	0.0847
proton-transporting two-sector ATPase complex (GO:0016469)	6.9e-08	3.74e-06	photosynthetic membrane (GO:0034357)	0.00191	0.0987
organelle part (GO:0044422)	1e-07	4.93e-06	thylakoid membrane (GO:0042651)	0.00189	0.102
intracellular organelle part (GO:0044446)	9.73e-08	5.02e-06	chloroplast stroma (GO:0009570)	0.00232	0.114
intrinsic component of membrane (GO:0031224)	1.42e-07	6.68e-06	plastid stroma (GO:0009532)	0.00256	0.12
cytochrome b6f complex (GO:0009512)	1.78e-07	8.02e-06	chloroplast envelope (GO:0009941)	0.00303	0.137
photosystem I (GO:0009522)	2.19e-07	9.49e-06	thylakoid part (GO:0044436)	0.00335	0.145
plastoglobule (GO:0010287)	4.84e-07	2.02e-05	plastid envelope (GO:0009526)	0.00367	0.153
cytochrome complex (GO:0070069)	1.32e-06	5.28e-05	thylakoid (GO:0009579)	0.00402	0.162
integral component of membrane (GO:0016021)	2.82e-06	0.000109	CCR4-NOT core complex (GO:0030015)	0.00466	0.18
proton-transporting ATP synthase complex, coupling factor F(o) (GO:0045263)	5.88e-06	0.00022	plastid thylakoid (GO:0031976)	0.00597	0.216
chloroplast ATP synthase complex (GO:0009544)	8.86e-06	0.00032	chloroplast thylakoid (GO:0009534)	0.00591	0.221
chloroplast (GO:0009507)	2.66e-05	0.000901	CCR4-NOT complex (GO:0030014)	0.00841	0.294
oxidoreductase complex (GO:1990204)	2.65e-05	0.000927
plastid (GO:0009536)	2.93e-05	0.000961
proton-transporting two-sector ATPase complex, proton-transporting domain (GO:0033177)	3.14e-05	0.001
photosystem I reaction center (GO:0009538)	5.62e-05	0.00169
chloroplast thylakoid membrane protein complex (GO:0098807)	5.54e-05	0.00172
NADH dehydrogenase complex (GO:0030964)	6.66e-05	0.00195
proton-transporting ATP synthase complex, catalytic core F(1) (GO:0045261)	0.000124	0.00354
proton-transporting two-sector ATPase complex, catalytic domain (GO:0033178)	0.000383	0.0106
respiratory chain complex (GO:0098803)	0.000404	0.0109
inner mitochondrial membrane protein complex (GO:0098800)	0.000433	0.0114
plasma membrane respiratory chain complex I (GO:0045272)	0.000441	0.0114
respiratory chain complex I (GO:0045271)	0.000779	0.0192
respirasome (GO:0070469)	0.000765	0.0193
plasma membrane respirasome (GO:0070470)	0.000818	0.0197
mitochondrial proton-transporting ATP synthase complex (GO:0005753)	0.000853	0.0201
nucleus (GO:0005634)	0.00136	0.0308
catalytic complex (GO:1902494)	0.00136	0.0313
plastid stroma (GO:0009532)	0.00143	0.0316
apoplast (GO:0048046)	0.00174	0.0377
mitochondrial membrane part (GO:0044455)	0.00205	0.0436
mitochondrial proton-transporting ATP synthase complex, coupling factor F(o) (GO:0000276)	0.00224	0.0466
mitochondrial protein complex (GO:0098798)	0.00228	0.0466
endomembrane system (GO:0012505)	0.0025	0.0502
monolayer-surrounded lipid storage body (GO:0012511)	0.0048	0.0946
organelle inner membrane (GO:0019866)	0.00669	0.129
photosystem II oxygen evolving complex (GO:0009654)	0.00761	0.145
mitochondrial inner membrane (GO:0005743)	0.00774	0.145
anchored component of membrane (GO:0031225)	0.00883	0.162

## Sheet: Table S2 B. Biological Process
GO biological process UP-regulated in Microgravity	raw P-value	FDR p-value	GO biological process DOWN-regulated in Microgravity	raw P-value	FDR p-value	GO biological process UP-regulated at Low gravity (<0,1g)	raw P-value	FDR p-value	GO biological process DOWN-regulated at Low gravity (<0,1g)	raw P-value	FDR p-value	GO biological process UP-regulated at the Moon gravity	raw P-value	FDR p-value	GO biological process DOWN-regulated at the Moon gravity	raw P-value	FDR p-value
photosynthesis (GO:0015979)	5.56e-18	3.29e-14	response to stimulus (GO:0050896)	1.05e-21	6.23e-18	defense response to other organism (GO:0098542)	7.45e-07	0.0044	response to oxygen-containing compound (GO:1901700)	1.84e-31	1.09e-27	cellular process (GO:0009987)	7.93e-07	0.00469	response to chitin (GO:0010200)	1.9e-07	0.00112
photosynthesis, light reaction (GO:0019684)	9.45e-13	2.79e-09	response to abiotic stimulus (GO:0009628)	1.01e-20	2.99e-17	response to other organism (GO:0051707)	8.11e-06	0.016	response to chitin (GO:0010200)	5.46e-30	1.61e-26	microtubule-based movement (GO:0007018)	0.000142	0.421	response to organonitrogen compound (GO:0010243)	4.39e-07	0.0013
generation of precursor metabolites and energy (GO:0006091)	2.4e-12	4.74e-09	response to stress (GO:0006950)	1e-19	1.98e-16	response to external biotic stimulus (GO:0043207)	8.11e-06	0.024	response to organonitrogen compound (GO:0010243)	7.66e-27	1.51e-23	regulation of biological quality (GO:0065008)	0.000232	0.457	cellular polysaccharide catabolic process (GO:0044247)	2.68e-06	0.00396
purine nucleoside triphosphate biosynthetic process (GO:0009145)	7.89e-09	1.17e-05	response to chitin (GO:0010200)	1.6e-19	2.37e-16	response to biotic stimulus (GO:0009607)	8.2e-06	0.0121	response to stimulus (GO:0050896)	2.53e-26	3.74e-23	response to salicylic acid (GO:0009751)	0.000236	0.349	glucan catabolic process (GO:0009251)	2.68e-06	0.00528
proton transmembrane transport (GO:1902600)	1.03e-08	1.22e-05	response to oxygen-containing compound (GO:1901700)	9.36e-19	1.11e-15	response to external stimulus (GO:0009605)	2.18e-05	0.0258	response to chemical (GO:0042221)	2.65e-26	3.13e-23	response to stimulus (GO:0050896)	0.00029	0.343	response to nitrogen compound (GO:1901698)	3.35e-06	0.00396		Analysis Type:	PANTHER Overrepresentation Test (Released 20190517)
purine nucleoside triphosphate metabolic process (GO:0009144)	1.22e-08	1.21e-05	response to drug (GO:0042493)	1.2e-17	1.18e-14	regulation of transcription, DNA-templated (GO:0006355)	3.08e-05	0.0304	response to drug (GO:0042493)	3.5e-26	3.45e-23	movement of cell or subcellular component (GO:0006928)	0.000444	0.438	cellular carbohydrate catabolic process (GO:0044275)	1.75e-05	0.0172		Annotation Version and Release Date:	GO Ontology database Released 2019-02-02
nucleoside triphosphate biosynthetic process (GO:0009142)	2.72e-08	2.3e-05	response to organic substance (GO:0010033)	1.66e-17	1.4e-14	regulation of nucleic acid-templated transcription (GO:1903506)	3.1e-05	0.0229	response to stress (GO:0006950)	1.06e-25	8.97e-23	cellular response to chemical stimulus (GO:0070887)	0.00051	0.431	starch catabolic process (GO:0005983)	2.47e-05	0.0209		Analyzed List:	upload_1 (Arabidopsis thaliana)
nucleoside triphosphate metabolic process (GO:0009141)	4.94e-08	3.65e-05	response to organonitrogen compound (GO:0010243)	5.17e-17	3.82e-14	regulation of RNA biosynthetic process (GO:2001141)	3.1e-05	0.0262	response to organic substance (GO:0010033)	1.08e-23	7.99e-21	cellular response to organic substance (GO:0071310)	0.000906	0.67	response to organic substance (GO:0010033)	2.6e-05	0.0192		Reference List:	Arabidopsis thaliana (all genes in database)
purine nucleotide biosynthetic process (GO:0006164)	5.5e-08	3.61e-05	response to chemical (GO:0042221)	1.88e-16	1.23e-13	regulation of RNA metabolic process (GO:0051252)	4.99e-05	0.0328	response to nitrogen compound (GO:1901698)	1.35e-23	8.84e-21	response to antibiotic (GO:0046677)	0.00111	0.729	response to drug (GO:0042493)	5.48e-05	0.036		Test Type:	FISHER
energy coupled proton transport, down electrochemical gradient (GO:0015985)	1.09e-07	5.88e-05	response to nitrogen compound (GO:1901698)	6.36e-15	3.76e-12	regulation of cellular biosynthetic process (GO:0031326)	5.38e-05	0.0318	response to acid chemical (GO:0001101)	1.01e-20	6e-18	leaf development (GO:0048366)	0.00135	0.8	response to stress (GO:0006950)	5.64e-05	0.0334		Correction:	FDR
ATP synthesis coupled proton transport (GO:0015986)	1.09e-07	6.47e-05	response to temperature stimulus (GO:0009266)	3.05e-14	1.64e-11	response to acid chemical (GO:0001101)	5.5e-05	0.0296	response to abiotic stimulus (GO:0009628)	9.5e-14	5.11e-11	response to organic cyclic compound (GO:0014070)	0.00145	0.777	response to temperature stimulus (GO:0009266)	7.85e-05	0.0422
ATP biosynthetic process (GO:0006754)	1.27e-07	6.24e-05	response to acid chemical (GO:0001101)	8.09e-14	3.99e-11	response to chemical (GO:0042221)	5.65e-05	0.0278	response to external stimulus (GO:0009605)	1.77e-13	8.74e-11	response to stress (GO:0006950)	0.00165	0.812	positive regulation of transcription, DNA-templated (GO:0045893)	8.06e-05	0.0397
purine-containing compound biosynthetic process (GO:0072522)	1.5e-07	6.82e-05	response to hormone (GO:0009725)	1.5e-12	6.84e-10	regulation of biosynthetic process (GO:0009889)	6.22e-05	0.0283	response to wounding (GO:0009611)	4.8e-13	2.18e-10	response to drug (GO:0042493)	0.00184	0.838	positive regulation of nucleic acid-templated transcription (GO:1903508)	8.29e-05	0.035
purine ribonucleoside triphosphate metabolic process (GO:0009205)	1.92e-07	7.57e-05	response to endogenous stimulus (GO:0009719)	1.97e-12	8.33e-10	regulation of nucleobase-containing compound metabolic process (GO:0019219)	7.08e-05	0.0299	defense response (GO:0006952)	5.44e-13	2.3e-10	response to chemical (GO:0042221)	0.00195	0.823	positive regulation of RNA biosynthetic process (GO:1902680)	8.29e-05	0.0377
purine ribonucleoside triphosphate biosynthetic process (GO:0009206)	1.92e-07	8.11e-05	photosynthesis, light harvesting in photosystem I (GO:0009768)	3.68e-12	1.45e-09	regulation of cellular macromolecule biosynthetic process (GO:2000112)	9.18e-05	0.0362	response to hormone (GO:0009725)	6.95e-13	2.74e-10	cellular response to salicylic acid stimulus (GO:0071446)	0.00204	0.806	regulation of transcription from RNA polymerase II promoter in response to stress (GO:0043618)	9.51e-05	0.0375
ribonucleoside triphosphate metabolic process (GO:0009199)	3.61e-07	0.000126	regulation of biosynthetic process (GO:0009889)	8.58e-11	3.17e-08	regulation of macromolecule biosynthetic process (GO:0010556)	9.69e-05	0.0358	response to other organism (GO:0051707)	7.52e-13	2.62e-10	'de novo' posttranslational protein folding (GO:0051084)	0.00242	0.842	regulation of DNA-templated transcription in response to stress (GO:0043620)	0.000105	0.0387
ribonucleoside triphosphate biosynthetic process (GO:0009201)	3.61e-07	0.000133	regulation of cellular biosynthetic process (GO:0031326)	2.53e-10	8.82e-08	regulation of gene expression (GO:0010468)	0.000105	0.0364	response to external biotic stimulus (GO:0043207)	7.52e-13	2.78e-10	chaperone cofactor-dependent protein refolding (GO:0051085)	0.00242	0.894	positive regulation of RNA metabolic process (GO:0051254)	0.000111	0.0385
purine ribonucleotide biosynthetic process (GO:0009152)	4.46e-07	0.000147	regulation of cellular macromolecule biosynthetic process (GO:2000112)	3.04e-10	9.98e-08				response to biotic stimulus (GO:0009607)	7.81e-13	2.57e-10	cellular response to hormone stimulus (GO:0032870)	0.00284	0.934	polysaccharide catabolic process (GO:0000272)	0.000125	0.0411
photosynthesis, light harvesting in photosystem II (GO:0009769)	8.32e-07	0.000259	regulation of macromolecule biosynthetic process (GO:0010556)	3.38e-10	1e-07				response to endogenous stimulus (GO:0009719)	9.03e-13	2.81e-10	microtubule-based process (GO:0007017)	0.00286	0.89	positive regulation of macromolecule biosynthetic process (GO:0010557)	0.000135	0.0419
ribonucleotide biosynthetic process (GO:0009260)	1.55e-06	0.000457	photosynthesis, light harvesting (GO:0009765)	3.31e-10	1.03e-07				response to abscisic acid (GO:0009737)	1.98e-12	5.87e-10	negative regulation of secondary metabolite biosynthetic process (GO:1900377)	0.00297	0.798	positive regulation of nucleobase-containing compound metabolic process (GO:0045935)	0.00014	0.0414
nucleotide biosynthetic process (GO:0009165)	1.84e-06	0.000519	regulation of nucleic acid-templated transcription (GO:1903506)	5.79e-10	1.49e-07				response to alcohol (GO:0097305)	2.43e-12	6.85e-10	regulation of sinapate ester biosynthetic process (GO:1903085)	0.00297	0.836	response to oxygen-containing compound (GO:1901700)	0.000169	0.0477
nucleoside phosphate biosynthetic process (GO:1901293)	2.04e-06	0.000548	regulation of RNA biosynthetic process (GO:2001141)	5.79e-10	1.56e-07				multi-organism process (GO:0051704)	2.6e-11	7e-09	negative regulation of sinapate ester biosynthetic process (GO:1903086)	0.00297	0.877	positive regulation of gene expression (GO:0010628)	0.000174	0.0467
ribose phosphate biosynthetic process (GO:0046390)	2.13e-06	0.000548	regulation of transcription, DNA-templated (GO:0006355)	5.72e-10	1.61e-07				response to water (GO:0009415)	8.08e-11	2.08e-08	cellular response to endogenous stimulus (GO:0071495)	0.00315	0.81	carbohydrate catabolic process (GO:0016052)	0.000201	0.0496
monovalent inorganic cation transport (GO:0015672)	4.29e-06	0.00106	response to cold (GO:0009409)	1.23e-09	3.03e-07				response to temperature stimulus (GO:0009266)	1.82e-10	4.48e-08	regulation of hormone levels (GO:0010817)	0.00317	0.781	positive regulation of cellular biosynthetic process (GO:0031328)	0.000201	0.0517
oxidation-reduction process (GO:0055114)	5.7e-06	0.00135	regulation of RNA metabolic process (GO:0051252)	1.4e-09	3.32e-07				response to lipid (GO:0033993)	2.14e-10	5.05e-08	lipid oxidation (GO:0034440)	0.00326	0.771
purine ribonucleotide metabolic process (GO:0009150)	6.05e-06	0.00138	regulation of nucleobase-containing compound metabolic process (GO:0019219)	2.69e-09	6.12e-07				response to water deprivation (GO:0009414)	2.48e-10	5.64e-08	cellular response to antibiotic (GO:0071236)	0.00337	0.767
inorganic cation transmembrane transport (GO:0098662)	7.13e-06	0.00156	regulation of cellular metabolic process (GO:0031323)	3.47e-09	7.32e-07				defense response to other organism (GO:0098542)	1.98e-09	4.35e-07	'de novo' protein folding (GO:0006458)	0.00349	0.764
photosynthesis, light harvesting (GO:0009765)	8.87e-06	0.00187	regulation of gene expression (GO:0010468)	3.41e-09	7.47e-07				response to osmotic stress (GO:0006970)	3.62e-09	7.65e-07	monocarboxylic acid metabolic process (GO:0032787)	0.00381	0.806
purine nucleotide metabolic process (GO:0006163)	9.43e-06	0.00192	regulation of nitrogen compound metabolic process (GO:0051171)	4.46e-09	9.09e-07				response to inorganic substance (GO:0010035)	4.93e-09	1e-06	chaperone-mediated protein folding (GO:0061077)	0.00396	0.809
cation transport (GO:0006812)	1.09e-05	0.00215	response to red light (GO:0010114)	6.07e-09	1.2e-06				response to cold (GO:0009409)	1.79e-08	3.53e-06	monocarboxylic acid catabolic process (GO:0072329)	0.00421	0.804
cation transmembrane transport (GO:0098655)	1.23e-05	0.00235	response to abscisic acid (GO:0009737)	6.37e-09	1.21e-06				response to bacterium (GO:0009617)	2.25e-08	4.29e-06	cytokinesis by cell plate formation (GO:0000911)	0.00421	0.831
ribonucleotide metabolic process (GO:0009259)	1.28e-05	0.00236	response to alcohol (GO:0097305)	7.06e-09	1.3e-06				innate immune response (GO:0045087)	2.61e-08	4.83e-06	Unclassified (UNCLASSIFIED)	0.00435	0.779
ATP metabolic process (GO:0046034)	1.73e-05	0.00311	regulation of primary metabolic process (GO:0080090)	9.02e-09	1.62e-06				immune response (GO:0006955)	3.65e-08	6.54e-06	biological_process (GO:0008150)	0.00435	0.804
ribose phosphate metabolic process (GO:0019693)	1.77e-05	0.00308	response to light stimulus (GO:0009416)	1.25e-08	2.17e-06				response to antibiotic (GO:0046677)	4.07e-08	7.07e-06	farnesyl diphosphate biosynthetic process, mevalonate pathway (GO:0010142)	0.00445	0.692
inorganic ion transmembrane transport (GO:0098660)	1.9e-05	0.00321	regulation of transcription from RNA polymerase II promoter in response to stress (GO:0043618)	1.94e-08	3.1e-06				immune system process (GO:0002376)	1.59e-07	2.68e-05	salicylic acid catabolic process (GO:0046244)	0.00445	0.711
purine-containing compound metabolic process (GO:0072521)	2.94e-05	0.00484	protein-chromophore linkage (GO:0018298)	1.94e-08	3.19e-06				response to oxidative stress (GO:0006979)	2.12e-07	3.49e-05	fatty acid alpha-oxidation (GO:0001561)	0.00445	0.731
photosynthetic electron transport chain (GO:0009767)	9.06e-05	0.0145	response to radiation (GO:0009314)	1.93e-08	3.26e-06				response to salt stress (GO:0009651)	2.62e-07	4.19e-05	(R)-2-hydroxy-alpha-linolenic acid biosynthetic process (GO:1902609)	0.00445	0.751
nucleotide metabolic process (GO:0009117)	9.83e-05	0.0153	regulation of DNA-templated transcription in response to stress (GO:0043620)	2.33e-08	3.63e-06				response to salicylic acid (GO:0009751)	3.91e-06	0.000608	isoprenoid biosynthetic process via mevalonate (GO:1902767)	0.00445	0.774
nucleoside phosphate metabolic process (GO:0006753)	0.000106	0.0161	response to wounding (GO:0009611)	2.71e-08	4.01e-06				ethylene-activated signaling pathway (GO:0009873)	5.43e-06	0.000823	phyllome development (GO:0048827)	0.00545	0.826
dATP metabolic process (GO:0046060)	0.000178	0.0239	response to ethylene (GO:0009723)	2.71e-08	4.11e-06				cellular response to ethylene stimulus (GO:0071369)	5.85e-06	0.000866	multi-organism process (GO:0051704)	0.00585	0.865
dATP biosynthetic process (GO:0006175)	0.000178	0.0245	response to heat (GO:0009408)	3.24e-08	4.68e-06				seed development (GO:0048316)	7.76e-06	0.00112	cellular response to stimulus (GO:0051716)	0.00644	0.93
dATP biosynthetic process from ADP (GO:0006176)	0.000178	0.025	regulation of metabolic process (GO:0019222)	3.56e-08	5.01e-06				response to ethylene (GO:0009723)	9.31e-06	0.00131	response to organic substance (GO:0010033)	0.00657	0.925
purine deoxyribonucleotide biosynthetic process (GO:0009153)	0.000178	0.0256	regulation of macromolecule metabolic process (GO:0060255)	1.21e-07	1.67e-05				macromolecule metabolic process (GO:0043170)	1.19e-05	0.00163	ER body organization (GO:0080119)	0.0074	0.973
purine deoxyribonucleoside triphosphate biosynthetic process (GO:0009216)	0.000178	0.0263	response to biotic stimulus (GO:0009607)	2.32e-07	2.98e-05				defense response, incompatible interaction (GO:0009814)	1.26e-05	0.00169	regulation of jasmonic acid biosynthetic process (GO:0080141)	0.0074	0.995
organophosphate biosynthetic process (GO:0090407)	0.000212	0.0279	response to other organism (GO:0051707)	2.28e-07	3e-05				fruit development (GO:0010154)	1.33e-05	0.00175	male meiosis II (GO:0007142)	0.0074	1
nucleobase-containing compound biosynthetic process (GO:0034654)	0.000224	0.0288	response to external biotic stimulus (GO:0043207)	2.28e-07	3.07e-05				regulation of response to stimulus (GO:0048583)	1.63e-05	0.0021	cellular response to drug (GO:0035690)	0.00759	0.976
electron transport chain (GO:0022900)	0.000301	0.0378	positive regulation of transcription, DNA-templated (GO:0045893)	2.92e-07	3.67e-05				cellular response to stimulus (GO:0051716)	1.89e-05	0.00238	response to oomycetes (GO:0002239)	0.00827	1
ion transport (GO:0006811)	0.000337	0.0415	positive regulation of nucleic acid-templated transcription (GO:1903508)	3.06e-07	3.7e-05				primary metabolic process (GO:0044238)	1.92e-05	0.00237	response to hormone (GO:0009725)	0.00875	1
ion transmembrane transport (GO:0034220)	0.000409	0.0494	positive regulation of RNA biosynthetic process (GO:1902680)	3.06e-07	3.78e-05				cellular response to chemical stimulus (GO:0070887)	2.2e-05	0.00266	farnesyl diphosphate biosynthetic process (GO:0045337)	0.00887	1
			positive regulation of biosynthetic process (GO:0009891)	3.27e-07	3.87e-05				regulation of response to stress (GO:0080134)	2.47e-05	0.00293	regulation of jasmonic acid metabolic process (GO:0080140)	0.00887	1
			response to high light intensity (GO:0009644)	3.58e-07	3.92e-05				defense response to bacterium (GO:0042742)	2.59e-05	0.003	phenol-containing compound catabolic process (GO:0019336)	0.00887	1
			positive regulation of transcription from RNA polymerase II promoter in response to heat stress (GO:0061408)	3.53e-07	3.94e-05				biological regulation (GO:0065007)	3.36e-05	0.00382	embryo sac cellularization (GO:0009558)	0.00887	1
			response to water deprivation (GO:0009414)	3.46e-07	4.02e-05				regulation of defense response to virus by host (GO:0050691)	3.46e-05	0.00386	response to endogenous stimulus (GO:0009719)	0.00922	1
			positive regulation of transcription from RNA polymerase II promoter in response to stress (GO:0036003)	3.53e-07	4.02e-05				phosphorelay signal transduction system (GO:0000160)	4.1e-05	0.00449	cellular lipid catabolic process (GO:0044242)	0.00952	1
			response to water (GO:0009415)	4.25e-07	4.57e-05				response to fungus (GO:0009620)	4.32e-05	0.00464	leaf senescence (GO:0010150)	0.00952	1
			response to lipid (GO:0033993)	4.46e-07	4.63e-05				response to heat (GO:0009408)	4.54e-05	0.00479	cytokinesis (GO:0000910)	0.00989	1
			regulation of cellular process (GO:0050794)	4.43e-07	4.67e-05				cellular response to hormone stimulus (GO:0032870)	4.87e-05	0.00505	organic hydroxy compound metabolic process (GO:1901615)	0.00997	1
			response to far red light (GO:0010218)	4.75e-07	4.85e-05				seed oilbody biogenesis (GO:0010344)	4.93e-05	0.00503
			positive regulation of RNA metabolic process (GO:0051254)	5.02e-07	4.95e-05				response to molecule of bacterial origin (GO:0002237)	5.07e-05	0.00509
			photosynthesis, light reaction (GO:0019684)	4.98e-07	4.99e-05				cellular response to organic substance (GO:0071310)	5.39e-05	0.00531
			regulation of biological process (GO:0050789)	5.24e-07	5e-05				gene expression (GO:0010467)	5.47e-05	0.00531
			response to inorganic substance (GO:0010035)	5.21e-07	5.05e-05				cellular response to endogenous stimulus (GO:0071495)	6.59e-05	0.00629
			defense response (GO:0006952)	5.4e-07	5.07e-05				defense response to fungus (GO:0050832)	7.78e-05	0.0073
			ethylene-activated signaling pathway (GO:0009873)	5.63e-07	5.2e-05				cold acclimation (GO:0009631)	7.87e-05	0.00728
			photosynthesis, light harvesting in photosystem II (GO:0009769)	6.35e-07	5.77e-05				response to organic cyclic compound (GO:0014070)	8.06e-05	0.00733
			positive regulation of macromolecule biosynthetic process (GO:0010557)	7.04e-07	6.31e-05				cellular nitrogen compound metabolic process (GO:0034641)	8.33e-05	0.00746
			response to antibiotic (GO:0046677)	7.29e-07	6.43e-05				nitrogen compound metabolic process (GO:0006807)	8.86e-05	0.00783
			positive regulation of nucleobase-containing compound metabolic process (GO:0045935)	7.52e-07	6.54e-05				camalexin biosynthetic process (GO:0010120)	9.17e-05	0.00786
			response to external stimulus (GO:0009605)	8.19e-07	7.02e-05				camalexin metabolic process (GO:0052317)	9.17e-05	0.00798
			photosynthesis (GO:0015979)	8.88e-07	7.5e-05				plant-type hypersensitive response (GO:0009626)	9.66e-05	0.00816
			positive regulation of gene expression (GO:0010628)	1.09e-06	9.04e-05				nucleobase-containing compound metabolic process (GO:0006139)	0.000101	0.00844
			positive regulation of cellular biosynthetic process (GO:0031328)	1.39e-06	0.000115				host programmed cell death induced by symbiont (GO:0034050)	0.000107	0.00877
			biological regulation (GO:0065007)	1.97e-06	0.00016				reproductive structure development (GO:0048608)	0.000111	0.00903
			cellular response to heat (GO:0034605)	2.08e-06	0.000167				reproductive system development (GO:0061458)	0.000114	0.00912
			positive regulation of cellular metabolic process (GO:0031325)	2.18e-06	0.00017				regulation of defense response to virus (GO:0050688)	0.000121	0.00939
			response to light intensity (GO:0009642)	2.17e-06	0.000171				regulation of immune effector process (GO:0002697)	0.000121	0.00952
			cellular response to ethylene stimulus (GO:0071369)	2.33e-06	0.000179				indole phytoalexin metabolic process (GO:0046217)	0.000156	0.0115
			response to red or far red light (GO:0009639)	2.46e-06	0.000187				indole phytoalexin biosynthetic process (GO:0009700)	0.000156	0.0117
			response to oxidative stress (GO:0006979)	2.78e-06	0.000203				phytoalexin metabolic process (GO:0052314)	0.000156	0.0118
			phosphorelay signal transduction system (GO:0000160)	2.77e-06	0.000205				phytoalexin biosynthetic process (GO:0052315)	0.000156	0.012
			positive regulation of biological process (GO:0048518)	2.76e-06	0.000207				regulation of defense response (GO:0031347)	0.000157	0.0115
			positive regulation of metabolic process (GO:0009893)	5.09e-06	0.000367				regulation of small molecule metabolic process (GO:0062012)	0.000161	0.0116
			response to low light intensity stimulus (GO:0009645)	5.42e-06	0.000386				lipid storage (GO:0019915)	0.000179	0.0128
			positive regulation of cellular process (GO:0048522)	5.56e-06	0.000392				developmental process (GO:0032502)	0.000191	0.0135
			response to desiccation (GO:0009269)	9.04e-06	0.000629				regulation of immune system process (GO:0002682)	0.000195	0.0136
			cellular response to hormone stimulus (GO:0032870)	9.45e-06	0.00065				regulation of cellular biosynthetic process (GO:0031326)	0.000197	0.0135
			cellular response to chemical stimulus (GO:0070887)	1.17e-05	0.000793				regulation of cellular ketone metabolic process (GO:0010565)	0.00023	0.0156
			cellular response to organic substance (GO:0071310)	1.2e-05	0.000805				seed dormancy process (GO:0010162)	0.000241	0.016
			cellular response to endogenous stimulus (GO:0071495)	1.23e-05	0.000818				dormancy process (GO:0022611)	0.000241	0.0162
			response to salicylic acid (GO:0009751)	1.25e-05	0.000819				regulation of signal transduction (GO:0009966)	0.000244	0.016
			cold acclimation (GO:0009631)	1.43e-05	0.00093				regulation of cellular metabolic process (GO:0031323)	0.000245	0.016
			defense response to other organism (GO:0098542)	1.45e-05	0.00093				cell communication (GO:0007154)	0.000253	0.0163
			phloem or xylem histogenesis (GO:0010087)	1.82e-05	0.00116				developmental process involved in reproduction (GO:0003006)	0.000254	0.0161
			positive regulation of nitrogen compound metabolic process (GO:0051173)	1.86e-05	0.00117				nucleic acid metabolic process (GO:0090304)	0.000256	0.0161
			cellular response to stimulus (GO:0051716)	2.53e-05	0.00158				post-embryonic development (GO:0009791)	0.000277	0.0172
			positive regulation of macromolecule metabolic process (GO:0010604)	2.84e-05	0.00175				regulation of signaling (GO:0023051)	0.00028	0.0173
			response to bacterium (GO:0009617)	6.03e-05	0.00368				regulation of biosynthetic process (GO:0009889)	0.000282	0.0172
			multi-organism process (GO:0051704)	8.38e-05	0.00506				maintenance of location (GO:0051235)	0.000286	0.0173
			hormone-mediated signaling pathway (GO:0009755)	0.000137	0.00817				biological_process (GO:0008150)	0.000313	0.0185
			cell division (GO:0051301)	0.000146	0.00866				Unclassified (UNCLASSIFIED)	0.000313	0.0187
			response to blue light (GO:0009637)	0.000152	0.00891				regulation of cell communication (GO:0010646)	0.000321	0.0188
			response to osmotic stress (GO:0006970)	0.000201	0.0116				response to reactive oxygen species (GO:0000302)	0.000337	0.0195
			defense response to bacterium (GO:0042742)	0.000238	0.0136				regulation of hormone levels (GO:0010817)	0.000339	0.0195
			response to fungus (GO:0009620)	0.000244	0.0139				regulation of cellular defense response (GO:0010185)	0.000364	0.0207
			defense response to insect (GO:0002213)	0.000246	0.0139				hormone biosynthetic process (GO:0042446)	0.000386	0.0217
			response to salt stress (GO:0009651)	0.00028	0.0156				exonucleolytic catabolism of deadenylated mRNA (GO:0043928)	0.000448	0.025
			response to organic cyclic compound (GO:0014070)	0.000345	0.0191				regulation of biological process (GO:0050789)	0.000455	0.0252
			positive regulation of auxin mediated signaling pathway (GO:0010929)	0.000386	0.0211				seed maturation (GO:0010431)	0.000456	0.025
			generation of precursor metabolites and energy (GO:0006091)	0.000555	0.0301				regulation of cellular process (GO:0050794)	0.000472	0.0256
			positive regulation of transcription by RNA polymerase II (GO:0045944)	0.000563	0.0303				regulation of nitrogen compound metabolic process (GO:0051171)	0.000497	0.0267
			immune system process (GO:0002376)	0.00063	0.0336				organelle organization (GO:0006996)	0.000601	0.0321
			cellular response to alcohol (GO:0097306)	0.000675	0.0354				regulation of salicylic acid metabolic process (GO:0010337)	0.000634	0.0335
			cellular response to abscisic acid stimulus (GO:0071215)	0.000675	0.0357				hormone metabolic process (GO:0042445)	0.000645	0.0338
			termination of RNA polymerase II transcription (GO:0006369)	0.000715	0.0371				hormone-mediated signaling pathway (GO:0009755)	0.000674	0.035
			cellular response to oxygen-containing compound (GO:1901701)	0.000895	0.046				response to high light intensity (GO:0009644)	0.0007	0.036
									regulation of metabolic process (GO:0019222)	0.000711	0.0362
									regulation of cellular macromolecule biosynthetic process (GO:2000112)	0.000716	0.0362
									ribonucleoprotein complex biogenesis (GO:0022613)	0.000722	0.0362
									organic substance metabolic process (GO:0071704)	0.000727	0.0361
									regulation of macromolecule biosynthetic process (GO:0010556)	0.000733	0.0361
									toxin biosynthetic process (GO:0009403)	0.000744	0.0364
									regulation of transcription, DNA-templated (GO:0006355)	0.000861	0.0417
									regulation of nucleic acid-templated transcription (GO:1903506)	0.000863	0.0412
									regulation of RNA biosynthetic process (GO:2001141)	0.000863	0.0415
									regulation of stomatal complex patterning (GO:2000037)	0.000919	0.0435
									regulation of biological quality (GO:0065008)	0.000962	0.0452
									regulation of primary metabolic process (GO:0080090)	0.00102	0.0476

## Sheet: Table S2 C. Molecular Function
GO Molecular Function UP-regulated in Microgravity	raw P-value	FDR p-value	GO Molecular Function DOWN-regulated in Microgravity	raw P-value	FDR p-value	GO Molecular Function UP-regulated at Low gravity (<0,1g)	raw P-value	FDR p-value	GO Molecular Function DOWN-regulated at Low gravity (<0,1g)	raw P-value	FDR p-value	GO Molecular Function UP-regulated at the Moon gravity	raw P-value	FDR p-value	GO Molecular Function DOWN-regulated at the Moon gravity	raw P-value	FDR p-value
NADH dehydrogenase (ubiquinone) activity (GO:0008137)	3.04e-10	3.13e-07	chlorophyll binding (GO:0016168)	3.96e-11	1.22e-07	DNA-binding transcription factor activity (GO:0003700)	0.000203	0.626	sequence-specific DNA binding (GO:0043565)	1.33e-05	0.041	motor activity (GO:0003774)	0.000348	0.536	transcription regulator activity (GO:0140110)	0.000168	0.173
NADH dehydrogenase (quinone) activity (GO:0050136)	3.04e-10	4.69e-07	DNA-binding transcription factor activity (GO:0003700)	1.26e-10	1.29e-07	transcription regulator activity (GO:0140110)	0.000433	0.668	DNA-binding transcription factor activity (GO:0003700)	6.08e-05	0.0937	microtubule motor activity (GO:0003777)	0.000176	0.541	phosphotransferase activity, paired acceptors (GO:0016781)	0.00012	0.185
NADH dehydrogenase activity (GO:0003954)	2.12e-10	6.53e-07	binding (GO:0005488)	1.04e-10	1.6e-07	dioxygenase activity (GO:0051213)	0.00277	1	poly(A)-specific ribonuclease activity (GO:0004535)	9.17e-05	0.0942	microtubule binding (GO:0008017)	0.00128	0.788	DNA-binding transcription factor activity (GO:0003700)	7.91e-05	0.244
oxidoreductase activity, acting on NAD(P)H (GO:0016651)	1.88e-09	1.45e-06	transcription regulator activity (GO:0140110)	6.79e-10	5.23e-07	sequence-specific DNA binding (GO:0043565)	0.00308	1	transcription regulator activity (GO:0140110)	0.000326	0.144	tubulin binding (GO:0015631)	0.00155	0.796	transcription regulatory region DNA binding (GO:0044212)	0.000471	0.29
oxidoreductase activity, acting on NAD(P)H, quinone or similar compound as acceptor (GO:0016655)	4.18e-09	2.58e-06	DNA binding (GO:0003677)	1.52e-07	9.36e-05	2-oxoglutarate-dependent dioxygenase activity (GO:0016706)	0.00337	1	transcription regulatory region DNA binding (GO:0044212)	0.000315	0.162	dioxygenase activity (GO:0051213)	0.00199	0.875	regulatory region nucleic acid binding (GO:0001067)	0.000471	0.363		Analysis Type:	PANTHER Overrepresentation Test (Released 20190517)
chlorophyll binding (GO:0016168)	8.08e-08	4.15e-05	transcription regulatory region DNA binding (GO:0044212)	2.52e-07	0.000111	regulatory region nucleic acid binding (GO:0001067)	0.00645	1	calcium ion binding (GO:0005509)	0.000245	0.189	oxidoreductase activity, acting on single donors with incorporation of molecular oxygen (GO:0016701)	0.00117	0.901	DNA binding (GO:0003677)	0.00179	0.921		Annotation Version and Release Date:	GO Ontology database Released 2019-02-02
quinone binding (GO:0048038)	1.13e-07	4.98e-05	regulatory region nucleic acid binding (GO:0001067)	2.52e-07	0.00013	transcription regulatory region DNA binding (GO:0044212)	0.00645	1	regulatory region nucleic acid binding (GO:0001067)	0.000315	0.194	oxidoreductase activity, acting on single donors with incorporation of molecular oxygen, incorporation of two atoms of oxygen (GO:0016702)	0.000911	0.935	glycogen phosphorylase activity (GO:0008184)	0.00854	0.975		Analyzed List:	upload_1 (Arabidopsis thaliana)
ATPase activity, coupled to transmembrane movement of ions, rotational mechanism (GO:0044769)	6.36e-07	0.000245	sequence-specific DNA binding (GO:0043565)	6.37e-07	0.000245				RNA polymerase II proximal promoter sequence-specific DNA binding (GO:0000978)	0.000736	0.284	hydroxymethylglutaryl-CoA synthase activity (GO:0004421)	0.00297	1	binding (GO:0005488)	0.00314	1		Reference List:	Arabidopsis thaliana (all genes in database)
cation-transporting ATPase activity (GO:0019829)	1.1e-06	0.000376	RNA polymerase II proximal promoter sequence-specific DNA binding (GO:0000978)	2.7e-06	0.000925				metal ion binding (GO:0046872)	0.00108	0.369	phosphatidylcholine phospholipase C activity (GO:0034480)	0.00445	1	sequence-specific DNA binding (GO:0043565)	0.0034	1		Test Type:	FISHER
proton-transporting ATP synthase activity, rotational mechanism (GO:0046933)	1.52e-06	0.000469	calcium ion binding (GO:0005509)	4.04e-06	0.00124				cation binding (GO:0043169)	0.00146	0.451	carboxy-lyase activity (GO:0016831)	0.00487	1	beta-gentiobiose beta-glucosidase activity (GO:0080083)	0.0057	1		Correction:	FDR
ATPase coupled ion transmembrane transporter activity (GO:0042625)	2.57e-06	0.000659	organic cyclic compound binding (GO:0097159)	5.57e-06	0.00143				MAP kinase kinase activity (GO:0004708)	0.00183	0.513	cytoskeletal protein binding (GO:0008092)	0.00573	1	esculin beta-glucosidase activity (GO:0080082)	0.0057	1
active ion transmembrane transporter activity (GO:0022853)	2.57e-06	0.000719	ion binding (GO:0043167)	5.42e-06	0.00152				3'-5'-exoribonuclease activity (GO:0000175)	0.00217	0.514	salicylic acid glucosyltransferase (glucoside-forming) activity (GO:0052640)	0.00592	1	4-methylumbelliferyl-beta-D-glucopyranoside beta-glucosidase activity (GO:0080081)	0.0057	1
ATPase activity, coupled to transmembrane movement of substances (GO:0042626)	5.33e-06	0.00126	heterocyclic compound binding (GO:1901363)	9.8e-06	0.00232				proximal promoter sequence-specific DNA binding (GO:0000987)	0.00212	0.545	linoleate 13S-lipoxygenase activity (GO:0016165)	0.0074	1	phosphoglucan, water dikinase activity (GO:0051752)	0.0057	1
ATPase activity, coupled to movement of substances (GO:0043492)	6.34e-06	0.0014	nucleic acid binding (GO:0003676)	1.33e-05	0.00293				protein serine/threonine/tyrosine kinase activity (GO:0004712)	0.00409	0.573	phosphoenolpyruvate carboxylase activity (GO:0008964)	0.0074	1	phosphogluco-amylopectin water dikinase activity (GO:0102219)	0.0057	1
NADPH dehydrogenase activity (GO:0003959)	1.88e-05	0.00387	tetrapyrrole binding (GO:0046906)	2.43e-05	0.005				DNA binding (GO:0003677)	0.00428	0.573	oxaloacetate decarboxylase activity (GO:0008948)	0.0074	1	zeaxanthin epoxidase [overall] activity (GO:0009540)	0.0057	1
primary active transmembrane transporter activity (GO:0015399)	2.35e-05	0.00425	metal ion binding (GO:0046872)	3.22e-05	0.00619				sucrose-phosphate synthase activity (GO:0046524)	0.00402	0.59	malate dehydrogenase (decarboxylating) (NADP+) activity (GO:0004473)	0.0074	1	amygdalin beta-glucosidase activity (GO:0047668)	0.0057	1
P-P-bond-hydrolysis-driven transmembrane transporter activity (GO:0015405)	2.22e-05	0.00427	cation binding (GO:0043169)	3.45e-05	0.00626				thiosulfate transmembrane transporter activity (GO:0015117)	0.00271	0.596	ionotropic glutamate receptor activity (GO:0004970)	0.00887	1	RNA polymerase II proximal promoter sequence-specific DNA binding (GO:0000978)	0.00586	1
oxidoreductase activity (GO:0016491)	2.77e-05	0.00475	proximal promoter sequence-specific DNA binding (GO:0000987)	5.14e-05	0.00879				RNA polymerase II regulatory region DNA binding (GO:0001012)	0.00379	0.615	neurotransmitter receptor activity (GO:0030594)	0.00887	1	scopolin beta-glucosidase activity (GO:0102483)	0.00705	1
tetrapyrrole binding (GO:0046906)	0.000244	0.0395	RNA polymerase II regulatory region DNA binding (GO:0001012)	0.000334	0.0514				nutrient reservoir activity (GO:0045735)	0.003	0.616	transmitter-gated channel activity (GO:0022835)	0.00887	1	SHG alpha-glucan phosphorylase activity (GO:0102499)	0.00854	1
cofactor binding (GO:0048037)	0.000331	0.0486	RNA polymerase II regulatory region sequence-specific DNA binding (GO:0000977)	0.000321	0.052				succinate transmembrane transporter activity (GO:0015141)	0.00402	0.619	transmitter-gated ion channel activity (GO:0022824)	0.00887	1	cellobiose glucosidase activity (GO:0080079)	0.00854	1
proton transmembrane transporter activity (GO:0015078)	0.000325	0.05	scopolin beta-glucosidase activity (GO:0102483)	0.00159	0.234				exoribonuclease activity (GO:0004532)	0.00366	0.626	extracellular ligand-gated ion channel activity (GO:0005230)	0.00887	1	alanine-tRNA ligase activity (GO:0004813)	0.00854	1
monovalent inorganic cation transmembrane transporter activity (GO:0015077)	0.000997	0.14	poly(A)-specific ribonuclease activity (GO:0004535)	0.00196	0.274				exoribonuclease activity, producing 5'-phosphomonoesters (GO:0016896)	0.00332	0.639				4-alpha-glucanotransferase activity (GO:0004134)	0.00854	1
ATPase activity, coupled (GO:0042623)	0.00186	0.249	transcription regulatory region sequence-specific DNA binding (GO:0000976)	0.00275	0.369				RNA polymerase II regulatory region sequence-specific DNA binding (GO:0000977)	0.00362	0.656				linear malto-oligosaccharide phosphorylase activity (GO:0102250)	0.00854	1
kinase activator activity (GO:0019209)	0.00341	0.42	3'-5' exonuclease activity (GO:0008408)	0.00476	0.611				oxaloacetate transmembrane transporter activity (GO:0015131)	0.00556	0.686				alpha-glucan, water dikinase activity (GO:0050521)	0.00854	1
protein kinase activator activity (GO:0030295)	0.00341	0.437	beta-glucosidase activity (GO:0008422)	0.00539	0.664				structural constituent of ribosome (GO:0003735)	0.00538	0.69				starch, H2O dikinase activity (GO:0102218)	0.00854	1
hydrolase activity, acting on ester bonds (GO:0016788)	0.00474	0.562	cofactor binding (GO:0048037)	0.0062	0.735				quercetin 7-O-glucosyltransferase activity (GO:0080044)	0.00747	0.853				maltodextrin water dikinase (GO:0102216)	0.00854	1
active transmembrane transporter activity (GO:0022804)	0.005	0.571	sequence-specific double-stranded DNA binding (GO:1990837)	0.00685	0.782				pyruvate decarboxylase activity (GO:0004737)	0.00734	0.869				very long-chain fatty acid-CoA ligase activity (GO:0031957)	0.00854	1
inorganic cation transmembrane transporter activity (GO:0022890)	0.00648	0.713							quercetin 3-O-glucosyltransferase activity (GO:0080043)	0.00936	0.994
									thiamine pyrophosphate binding (GO:0030976)	0.00933	1

## Sheet: Table 2. FC  DEGs (FDR q<0,05)
Microg - Upregulated		Microg - Downregulated			Lowg - Upregulated		Lowg - Downregulated			Moon g - Upregulated		Moon g - Downregulated
AT5G07560	8.4371	AT5G45428	-27.5467		AT4G19730	9.96643	AT5G45428	-27.7182		AT5G07560	7.44137	AT5G45428	-27.462
ATMG01080	5.88263	AT1G25470	-11.8918		AT4G13410	9.03006	AT3G53400	-12.0872		AT4G20440	3.81322	AT5G53588	-9.25846
AT2G28270	4.33346	AT1G50520	-8.00444		AT5G52710	7.16168	AT2G13660	-8.56591		AT3G09440	3.35002	AT1G72570	-8.51158
AT2G01021	3.39489	AT1G76290	-6.49408		AT5G59270	7.14006	AT1G51430	-8.29733		AT1G53130	2.45774	AT1G50520	-8.33984
ATCG00900	3.21123	AT5G04500	-5.98754		AT1G26250	5.09725	AT1G73300	-7.38683		AT1G66600	2.35996	AT3G54530	-7.10616
AT3G03260	3.06848	AT3G46480	-5.83488		AT1G07560	4.41293	AT3G54530	-7.38024		AT1G25472	1.85645	AT5G52550	-6.39122
ATCG01250	2.95418	AT2G34315	-5.54787		AT5G59680	3.69111	AT1G07060	-6.93845		AT1G60750	1.37194	AT5G18450	-6.36914
ATMG01200	2.63306	AT5G03200	-3.60827		AT1G24996	3.61474	AT5G60440	-6.90003		AT1G53700	1.33014	AT3G19230	-6.15358
AT1G25472	2.52427	AT5G28510	-3.00248		AT2G28960	3.24478	AT4G32630	-6.83386		AT4G12170	1.29676	AT4G19510	-4.64456
AT1G26250	2.35474	AT4G02540	-2.65975		AT2G14610	3.12767	AT2G19320	-6.81619		AT3G11402	1.19485	AT4G02540	-3.2316
AT1G68480	2.33393	AT5G42380	-2.40936		AT5G36870	3.07018	AT1G08080	-6.63143		AT5G16570	1.1215	AT2G42170	-3.23117
AT4G09110	2.27228	AT5G51190	-2.37505		AT1G33055	2.72116	AT4G18660	-6.58121		AT4G19370	1.09452	AT1G76650	-3.21248
ATCG00020	2.21628	AT3G27660	-2.22951		AT2G36690	2.58881	AT2G20150	-6.57407		AT1G06660	1.08417	AT1G27461	-2.6861
AT4G28240	2.19784	AT4G26050	-2.21254		AT4G14620	2.47291	AT3G46480	-6.44462		AT1G57943	1.07777	AT4G25470	-2.31035
AT2G42060	2.19339	AT4G00650	-2.04401		AT2G42060	2.42868	AT4G26390	-6.33587		AT3G06040	1.04883	AT3G55500	-2.25403
AT1G53130	2.13538	AT4G10250	-2.0419		AT4G09780	2.42234	AT3G22490	-6.30181		AT3G03530	0.990394	AT1G20925	-2.25092
ATCG00210	2.08652	AT3G29000	-2.03403		AT4G23290	2.42103	AT1G68250	-5.9906		AT3G10310	0.982689	AT3G24140	-1.94614
AT1G24996	2.06916	AT4G28520	-2.02854		AT1G18970	2.38117	AT1G28640	-5.66085		AT4G10500	0.959288	AT5G47330	-1.93934
ATCG00580	2.04138	AT5G47220	-1.96637		AT5G56550	2.32795	AT1G27990	-5.31654		AT4G21560	0.94276	AT1G72910	-1.91047
ATCG00590	2.01933	AT4G11280	-1.92312		AT2G30670	2.30253	AT2G42560	-5.25387		AT1G14540	0.941574	AT1G07135	-1.89622
ATCG00550	2.00994	AT5G46350	-1.91288		AT1G51890	2.2694	AT1G80090	-5.20463		AT5G48070	0.929132	AT5G26000	-1.83241
ATCG00570	1.98746	AT3G44990	-1.89509		AT1G66600	2.22697	AT1G48470	-4.95692		AT1G74810	0.922233	AT5G61600	-1.67455
ATCG00560	1.98172	AT2G30766	-1.88265		AT2G44220	2.17115	AT2G42000	-4.93865		AT1G18370	0.888195	AT5G57180	-1.64943
ATCG00330	1.96761	AT3G15370	-1.87563		AT1G51790	2.16198	AT4G18650	-4.72293		AT2G43640	0.866773	AT5G05965	-1.56914
AT2G07732	1.94329	AT1G61470	-1.86283		AT5G07650	2.0733	AT1G54860	-4.54698		AT5G61030	0.812751	AT3G50800	-1.51325
ATCG00600	1.92041	AT1G61340	-1.83315		AT5G03350	2.02575	AT3G01570	-4.48209		AT3G11340	0.810003	AT5G22800	-1.45199
ATCG00340	1.91773	AT2G05100	-1.8315		AT4G23260	2.00686	AT1G12030	-4.48188		AT2G28620	0.711266	AT1G56150	-1.3496
AT5G38910	1.86379	AT5G39670	-1.82908		AT3G59940	1.95161	AT3G51810	-4.48012		AT5G11670	0.699504	AT4G19170	-1.28599
ATCG01010	1.83947	AT3G27690	-1.80653		AT4G30120	1.78147	AT4G36600	-4.41463		AT1G14780	0.684013	AT5G57240	-1.25609
ATCG00720	1.82966	AT1G35210	-1.77809		AT5G02090	1.74659	AT1G54870	-4.4081		AT3G01420	0.673166	AT2G45560	-1.25276
ATCG00510	1.82725	AT1G80840	-1.77769		AT4G26288	1.67462	AT1G04560	-4.3762		AT5G11210	0.639671	AT3G53800	-1.21763
ATCG00350	1.82408	AT3G44260	-1.76045		AT4G10910	1.67178	AT1G77950	-4.33706		AT1G33700	0.635691	AT2G02450	-1.17673
ATCG00730	1.78942	AT2G42530	-1.74278		AT5G04310	1.54333	AT1G23070	-4.29813		AT4G38620	0.631783	AT2G46600	-1.16213
ATCG00070	1.78526	AT1G29920	-1.73877		AT1G25440	1.52919	AT5G62800	-4.25193		AT3G14940	0.614277	AT5G50160	-1.15576
ATCG00540	1.77051	AT2G39920	-1.73097		AT5G52860	1.52533	AT1G73190	-4.24663		AT1G67560	0.60932	AT3G18080	-1.09112
ATCG01000	1.75872	AT4G27280	-1.7198		AT3G46190	1.52031	AT2G23640	-4.24329		AT5G62300	0.598749	AT2G29630	-1.06669
ATCG00710	1.7538	AT2G05070	-1.71122		AT4G05200	1.4445	AT5G40420	-4.22716		AT1G61667	0.553246	AT1G67970	-1.05998
ATCG01050	1.74004	AT1G27730	-1.70344		AT1G23390	1.40648	AT2G36640	-4.20727		AT5G57887	0.537411	AT1G53450	-1.05463
ATCG00680	1.73969	AT3G50930	-1.70127		AT5G26690	1.38764	AT3G12960	-4.20235		AT1G14980	0.516919	AT1G51090	-1.03667
ATCG00420	1.72862	AT5G63350	-1.69126		AT3G52060	1.3812	AT3G15670	-4.16551		AT4G11820	0.516645	AT3G62550	-0.998974
ATCG01040	1.69913	AT4G25470	-1.6888		AT5G03230	1.37423	AT5G55240	-4.15787		AT1G03220	0.308752	AT2G47240	-0.966468
ATCG00080	1.69115	AT5G61600	-1.66368		AT3G44120	1.36321	AT2G21490	-4.14364		AT3G15950	0.297094	AT2G46870	-0.960623
ATCG00500	1.66712	AT5G47230	-1.64828		AT1G23130	1.36267	AT5G66400	-4.1066				AT2G40000	-0.948372
ATCG00430	1.66117	AT3G22830	-1.6429		AT1G51840	1.25202	AT2G18540	-4.07563				AT3G18500	-0.895769
ATCG00530	1.64739	AT5G43840	-1.62025		AT5G22890	1.18303	AT2G18340	-4.03755				AT5G59820	-0.889462
ATCG00270	1.63967	AT2G21770	-1.58021		AT1G31310	1.17947	AT5G62490	-4.01086				AT4G27657	-0.874004
ATCG00130	1.63948	AT2G26530	-1.58015		AT5G06530	1.11982	AT5G22470	-3.97359				AT1G49650	-0.860041
ATCG01060	1.63576	AT1G72910	-1.57016		AT4G08870	1.11533	AT4G09590	-3.9612				AT4G30370	-0.848911
ATCG00520	1.63095	AT3G50800	-1.50883		AT3G52480	1.11127	AT4G31830	-3.94327				AT1G25560	-0.83797
ATCG00120	1.6299	AT2G38470	-1.50553		AT4G29340	1.08671	AT2G28490	-3.94231				AT5G67030	-0.829356
AT5G07650	1.60429	AT5G05965	-1.48743		AT1G51830	1.08347	AT5G66780	-3.91363				AT5G26570	-0.828231
ATCG00440	1.59426	AT1G76650	-1.46976		AT5G14370	1.07892	AT5G44310	-3.86815				AT1G10760	-0.816523
ATCG00690	1.58609	AT5G60350	-1.46458		AT4G27410	1.07083	AT5G06760	-3.86804				AT1G23400	-0.814503
ATCG00480	1.57951	AT3G56710	-1.4097		AT3G13000	1.05959	AT3G22640	-3.85886				AT3G46970	-0.797209
AT5G52860	1.57795	AT5G45340	-1.40568		AT4G10500	1.04602	AT4G18422	-3.83954				AT4G37260	-0.788686
AT3G16530	1.57632	AT1G73540	-1.38636		AT1G67030	1.03037	AT5G44120	-3.79028				AT3G56880	-0.786228
ATCG00630	1.55107	AT3G50060	-1.36995		AT3G48520	0.991256	AT5G65165	-3.77493				AT5G56100	-0.776068
ATCG01080	1.53712	AT1G18300	-1.36272		AT2G04240	0.959651	AT4G16160	-3.74699				AT2G40960	-0.742976
ATCG01070	1.53649	AT5G26000	-1.36195		AT5G51810	0.940609	AT5G35660	-3.68699				AT1G21590	-0.739567
ATCG00150	1.49555	AT4G24570	-1.34853		AT3G09220	0.933336	AT1G17810	-3.66927				AT5G54490	-0.733391
ATCG00220	1.46622	AT4G17490	-1.3372		AT1G56010	0.876338	AT2G42540	-3.65199				AT1G73500	-0.729102
AT4G05200	1.45253	AT1G08440	-1.32668		AT4G21560	0.840858	AT1G07645	-3.59425				AT1G60160	-0.711094
ATCG01090	1.43	AT1G73010	-1.30559		AT3G56060	0.839613	AT5G51190	-3.5545				AT1G06460	-0.68902
ATCG00470	1.41139	AT5G57180	-1.29291		AT1G28130	0.82924	AT1G72100	-3.54332				AT4G37180	-0.684292
AT3G43833	1.40855	AT1G51700	-1.25872		AT1G13300	0.81315	AT3G02480	-3.52262				AT2G28900	-0.680382
AT5G26690	1.37901	AT5G52750	-1.22171		AT5G51460	0.812357	AT2G23240	-3.50294				AT1G10910	-0.671586
AT3G46190	1.37804	AT1G28370	-1.20968		AT3G56250	0.795978	AT4G09600	-3.50208				AT4G35440	-0.660368
AT5G25260	1.37678	AT1G18570	-1.17834		AT5G06270	0.793254	AT3G54940	-3.4992				AT4G11660	-0.647568
AT1G51840	1.37055	AT1G72920	-1.17588		AT1G31500	0.749132	AT5G43770	-3.49644				AT5G67570	-0.622176
ATMG00690	1.35688	AT5G54270	-1.17187		AT1G03850	0.716992	AT3G05260	-3.48796				AT1G32640	-0.589807
AT5G50760	1.35395	AT5G43620	-1.16596		AT2G02060	0.710832	AT3G53040	-3.45305				AT3G47800	-0.585223
AT1G18970	1.34441	AT2G21640	-1.15079		AT5G32460	0.699295	AT3G44260	-3.43779				AT4G02380	-0.572914
AT4G10860	1.34068	AT5G57240	-1.12866		AT5G67420	0.69469	AT2G41260	-3.42068				AT4G17500	-0.547938
AT4G14630	1.31116	AT5G54490	-1.12008		AT4G32480	0.661954	AT1G67856	-3.39119				AT4G25450	-0.538411
AT3G22240	1.28389	AT3G24650	-1.1035		AT1G78080	0.652939	AT4G27654	-3.30865				AT1G13270	-0.532059
AT1G61560	1.27242	AT2G40140	-1.08609		AT1G13700	0.632388	AT2G44840	-3.27401				AT3G46620	-0.527895
AT1G51890	1.26412	AT5G46710	-1.08523		AT2G21185	0.624039	AT3G58450	-3.25576				AT4G37480	-0.526638
AT1G51830	1.24854	AT1G66500	-1.07687		AT3G18773	0.62152	AT1G22600	-3.21352				AT5G64860	-0.525059
AT1G70985	1.22959	AT5G22800	-1.06221		AT2G02990	0.607734	AT2G28420	-3.20869				AT5G20380	-0.508464
AT4G34790	1.22153	AT3G16720	-1.05309		AT1G74910	0.593241	AT1G71250	-3.19419				AT2G28840	-0.350306
ATMG00980	1.21517	AT3G18080	-1.05285		AT3G24520	0.578097	AT4G27530	-3.17735				AT1G09010	-0.349992
AT4G12170	1.21414	AT5G62020	-1.04871		AT3G63210	0.559502	AT3G03620	-3.1243
AT5G24580	1.19757	AT5G06980	-1.0191		AT4G31310	0.528008	AT2G38905	-3.097
AT1G67860	1.12842	AT3G54890	-1.01119		AT5G14610	0.513142	AT2G22590	-3.07011
AT4G21560	1.10621	AT1G67970	-1.00426		AT1G13360	0.50884	AT4G21020	-3.06975
AT1G60060	1.08639	AT2G35930	-0.973179		AT3G44730	0.504965	AT3G15280	-3.05527
AT5G22890	1.08549	AT3G53800	-0.921997		AT4G38620	0.501579	AT1G48130	-3.05333
AT3G11402	1.05211	AT2G46680	-0.906809		AT5G17860	0.498674	AT2G40170	-3.03849
ATCG01020	1.01785	AT1G66400	-0.882801		AT3G01420	0.497813	AT5G50600	-3.03296
AT2G14900	1.01375	AT2G46600	-0.881926		AT5G23680	0.463108	AT2G42170	-3.02718
AT3G12040	1.00911	AT1G20450	-0.86386		AT4G00270	0.427523	AT1G04920	-3.00104
AT5G50820	1.00652	AT3G08940	-0.852964		AT2G23340	0.425377	AT3G09922	-2.99823
AT4G16563	0.98664	AT1G25560	-0.852257		AT1G01720	0.413732	AT3G22910	-2.93878
AT1G67030	0.985037	AT1G03790	-0.850828		AT2G36400	0.345848	AT3G29000	-2.90001
ATMG00990	0.962833	AT3G61190	-0.842699				AT5G47220	-2.863
AT4G37450	0.925871	AT5G27990	-0.83044				AT3G50980	-2.85011
AT1G80280	0.923634	AT3G12830	-0.813714				AT2G33520	-2.84563
AT3G09220	0.919988	AT1G70420	-0.810229				AT3G03341	-2.81556
AT1G19050	0.912006	AT5G59820	-0.807104				AT5G42380	-2.81482
AT5G51810	0.91008	AT1G24530	-0.77423				AT1G27730	-2.78249
AT5G37740	0.887964	AT1G18265	-0.772669				AT4G02540	-2.77045
AT4G13235	0.860032	AT1G53450	-0.746097				AT1G16850	-2.76982
AT3G28345	0.857519	AT3G28340	-0.741931				AT4G24570	-2.76472
AT5G06270	0.8468	AT4G17500	-0.740636				AT5G01300	-2.75955
AT5G10625	0.822913	AT5G42050	-0.738757				AT2G21820	-2.75838
AT5G16570	0.804954	AT2G40000	-0.723046				AT4G11040	-2.73369
AT1G05710	0.789283	AT3G57070	-0.712602				AT5G45340	-2.72247
AT1G18980	0.780286	AT5G67030	-0.707617				AT5G07330	-2.69083
AT1G78000	0.774244	AT1G21590	-0.687768				AT5G52310	-2.67905
AT3G01950	0.751091	AT2G29670	-0.685112				AT4G36700	-2.67495
AT5G05180	0.717541	AT4G20480	-0.672791				AT1G15330	-2.66774
AT3G59310	0.704592	AT1G56300	-0.655401				AT5G24600	-2.66673
AT2G30930	0.701762	AT1G32640	-0.650378				AT1G49032	-2.65118
AT1G10470	0.677896	AT1G73500	-0.64993				AT3G50930	-2.62668
AT3G01420	0.671691	AT4G37260	-0.632452				AT4G11280	-2.60749
AT5G47700	0.669983	AT2G41190	-0.620394				AT1G69150	-2.5972
AT3G13520	0.667378	AT5G03180	-0.617823				AT1G61840	-2.58692
AT4G25890	0.638935	AT2G46270	-0.602318				AT5G42290	-2.5854
AT4G15140	0.630738	AT5G61390	-0.601405				AT3G21370	-2.58087
AT2G43340	0.628227	AT1G13930	-0.600704				AT5G59170	-2.57289
AT1G14980	0.627738	AT1G30810	-0.594692				AT1G72240	-2.56623
AT2G36060	0.613226	AT1G10760	-0.584578				AT3G11050	-2.56398
AT1G61667	0.594307	AT1G01240	-0.573705				AT4G27280	-2.55635
AT4G14010	0.589588	AT3G47800	-0.555449				AT2G23110	-2.54266
AT5G05370	0.576828	AT3G53810	-0.538544				AT1G61340	-2.52998
AT5G18690	0.564425	AT3G46620	-0.531552				AT1G24140	-2.51642
AT1G22500	0.553866	AT1G32870	-0.507509				AT4G29780	-2.51603
AT3G47690	0.542467	AT1G24340	-0.501655				AT1G73010	-2.51562
AT5G63500	0.515587	AT3G25600	-0.496282				AT1G16730	-2.50824
AT1G07770	0.505635	AT4G37180	-0.493326				AT5G43170	-2.50506
AT4G30190	0.496142	AT4G37480	-0.48507				AT2G44578	-2.47704
AT1G75270	0.471016	AT1G78270	-0.484339				AT4G17490	-2.45838
AT2G23930	0.467257	AT5G48630	-0.480001				AT1G47980	-2.44917
AT1G11475	0.462435	AT1G10910	-0.471297				AT5G17350	-2.4427
AT3G54430	0.46035	AT2G35690	-0.463603				AT4G10250	-2.43746
AT4G39300	0.451935	AT1G09940	-0.40613				AT3G55980	-2.4361
AT3G17210	0.449158	AT1G14370	-0.380161				AT2G47770	-2.43188
AT5G02380	0.443725	AT1G65280	-0.378777				AT2G35300	-2.402
AT3G05490	0.430898	AT4G23040	-0.362714				AT2G01300	-2.39001
AT2G27960	0.426797	AT3G26000	-0.36131				AT1G35210	-2.38716
AT3G50830	0.397486	AT5G02230	-0.357285				AT3G03240	-2.38094
AT2G34585	0.379873	AT3G02990	-0.355833				AT2G22500	-2.35755
AT3G52940	0.377758	AT2G17700	-0.35501				AT4G02170	-2.352
AT3G13110	0.376707	AT2G28840	-0.338178				AT1G72520	-2.34918
AT4G26840	0.36852						AT3G15370	-2.3438
AT1G07420	0.363318						AT5G60350	-2.33338
AT4G34980	0.351137						AT1G09950	-2.32682
AT3G54640	0.33062						AT1G77960	-2.31808
AT2G18030	0.325856						AT1G29680	-2.31448
AT4G24440	0.316729						AT1G76650	-2.3093
AT5G59880	0.307492						AT1G05510	-2.30817
AT4G24210	0.305261						AT5G37490	-2.30346
							AT1G32560	-2.28952
							AT4G23810	-2.28412
							AT5G24130	-2.28252
							AT2G19900	-2.27905
							AT4G02690	-2.27715
							AT1G50750	-2.2694
							AT4G27652	-2.25742
							AT5G38780	-2.25655
							AT1G80840	-2.23319
							AT1G58420	-2.22375
							AT2G31083	-2.2211
							AT1G07135	-2.20821
							AT1G14480	-2.20582
							AT1G02700	-2.19335
							AT1G14930	-2.1863
							AT5G16460	-2.18078
							AT5G60220	-2.16931
							AT3G54000	-2.1504
							AT1G72360	-2.14913
							AT5G47230	-2.14895
							AT2G32140	-2.14645
							AT2G46400	-2.13083
							AT2G39650	-2.12663
							AT4G25490	-2.11936
							AT4G24380	-2.11307
							AT2G35290	-2.10541
							AT1G72920	-2.09555
							AT3G19920	-2.0929
							AT1G65310	-2.0795
							AT3G50800	-2.07139
							AT5G64870	-2.05895
							AT1G61470	-2.05304
							AT1G77640	-2.02172
							AT1G18570	-2.01853
							AT5G52020	-1.99071
							AT4G24150	-1.98512
							AT2G38470	-1.97717
							AT5G28610	-1.97463
							AT4G30430	-1.95771
							AT3G23630	-1.94887
							AT2G26530	-1.94449
							AT4G17670	-1.92604
							AT1G19180	-1.92117
							AT5G43620	-1.91451
							AT2G04500	-1.91391
							AT2G35930	-1.9076
							AT1G66500	-1.90681
							AT1G28370	-1.9012
							AT5G25340	-1.8915
							AT4G31800	-1.88603
							AT3G45960	-1.87581
							AT1G66170	-1.87004
							AT2G36090	-1.86848
							AT1G78780	-1.85409
							AT5G47810	-1.83518
							AT1G18300	-1.8322
							AT1G73540	-1.82867
							AT3G56710	-1.81569
							AT5G07580	-1.80934
							AT4G25810	-1.8027
							AT3G25780	-1.8023
							AT1G22470	-1.79457
							AT5G41750	-1.76604
							AT4G39950	-1.75247
							AT1G49230	-1.74962
							AT5G03890	-1.74416
							AT1G11210	-1.73298
							AT3G23170	-1.7128
							AT3G50970	-1.70177
							AT1G26730	-1.6887
							AT2G32560	-1.68014
							AT2G30020	-1.68005
							AT1G57590	-1.6788
							AT2G32210	-1.67425
							AT4G26890	-1.66682
							AT2G25450	-1.63677
							AT2G31980	-1.63487
							AT1G32920	-1.63343
							AT5G35735	-1.62697
							AT3G27500	-1.62425
							AT5G61600	-1.62142
							AT2G36270	-1.6199
							AT2G16660	-1.61052
							AT3G12955	-1.59528
							AT5G54490	-1.58397
							AT2G32030	-1.57606
							AT3G50060	-1.57382
							AT2G35710	-1.57223
							AT2G41640	-1.57115
							AT5G44350	-1.56325
							AT5G64310	-1.5561
							AT5G28630	-1.55581
							AT3G27540	-1.55487
							AT5G26920	-1.5217
							AT2G47560	-1.50644
							AT1G27770	-1.50161
							AT3G28340	-1.49818
							AT3G17690	-1.49549
							AT1G72940	-1.48462
							AT1G51700	-1.47978
							AT2G34810	-1.47108
							AT4G33970	-1.45828
							AT1G07160	-1.45365
							AT3G50340	-1.43503
							AT1G61890	-1.41865
							AT4G11050	-1.41726
							AT3G57530	-1.41712
							AT3G16510	-1.41552
							AT3G47570	-1.40179
							AT1G58037	-1.39707
							AT5G52750	-1.38625
							AT4G18210	-1.38087
							AT1G52560	-1.37443
							AT2G20142	-1.36754
							AT3G57450	-1.36233
							AT1G66400	-1.36172
							AT5G41550	-1.35098
							AT3G63350	-1.3334
							AT4G33070	-1.32529
							AT2G38465	-1.31863
							AT5G17460	-1.3038
							AT3G59900	-1.29156
							AT3G26250	-1.29081
							AT3G52800	-1.29003
							AT3G08860	-1.28814
							AT5G43180	-1.27372
							AT2G30040	-1.26849
							AT4G21390	-1.26744
							AT3G10815	-1.26427
							AT5G59580	-1.26134
							AT3G46080	-1.24868
							AT2G28080	-1.23971
							AT5G26030	-1.23785
							AT3G45640	-1.23632
							AT5G62520	-1.21917
							AT2G23810	-1.21903
							AT1G66160	-1.21696
							AT5G24590	-1.21558
							AT3G04640	-1.2109
							AT5G25190	-1.20621
							AT5G57480	-1.20488
							AT1G44830	-1.20466
							AT3G25600	-1.20287
							AT2G20562	-1.19786
							AT4G09840	-1.19737
							AT1G56300	-1.19727
							AT2G44080	-1.19061
							AT5G62020	-1.18994
							AT4G17500	-1.18256
							AT2G40140	-1.18168
							AT5G64660	-1.17927
							AT2G41800	-1.1768
							AT5G01930	-1.17339
							AT4G27657	-1.16662
							AT1G44100	-1.16438
							AT1G24530	-1.16191
							AT1G51660	-1.15686
							AT3G49530	-1.14902
							AT1G13930	-1.14777
							AT1G73480	-1.14656
							AT2G34930	-1.13695
							AT5G18470	-1.13542
							AT3G52400	-1.13374
							AT2G32190	-1.1272
							AT1G13530	-1.12548
							AT5G11110	-1.11415
							AT3G14870	-1.11204
							AT3G16720	-1.10366
							AT3G57070	-1.1025
							AT2G34140	-1.09897
							AT1G01470	-1.09022
							AT3G25730	-1.09014
							AT2G41410	-1.08571
							AT5G57010	-1.08072
							AT5G61900	-1.07671
							AT1G61930	-1.07367
							AT2G05940	-1.06504
							AT4G25390	-1.06424
							AT5G24040	-1.0639
							AT5G66070	-1.06248
							AT2G31880	-1.06173
							AT4G33920	-1.05562
							AT5G11650	-1.04729
							AT2G32020	-1.03008
							AT1G14040	-1.02182
							AT4G25580	-1.01683
							AT4G11910	-1.01627
							AT4G26200	-1.00988
							AT5G22250	-1.00819
							AT5G66675	-1.00765
							AT1G62570	-0.996449
							AT4G36500	-0.990109
							AT5G10300	-0.985968
							AT5G06320	-0.982825
							AT3G28210	-0.975373
							AT3G03640	-0.968219
							AT4G24430	-0.965132
							AT1G53340	-0.964773
							AT5G10695	-0.962977
							AT4G20780	-0.960803
							AT5G01100	-0.959132
							AT2G18690	-0.95616
							AT4G31730	-0.955337
							AT2G41010	-0.953627
							AT1G19770	-0.92839
							AT4G36770	-0.927213
							AT2G36220	-0.92715
							AT2G41630	-0.925618
							AT1G19020	-0.923486
							AT5G59820	-0.92278
							AT3G02140	-0.921378
							AT3G12320	-0.916582
							AT5G42050	-0.909563
							AT3G15530	-0.894692
							AT4G14370	-0.894116
							AT3G62260	-0.893003
							AT2G06050	-0.89257
							AT5G35580	-0.881935
							AT3G10120	-0.876879
							AT1G73500	-0.876552
							AT3G25250	-0.874507
							AT5G65300	-0.874038
							AT5G13200	-0.869216
							AT5G22540	-0.865835
							AT4G20480	-0.85251
							AT1G20510	-0.850808
							AT4G31550	-0.846487
							AT4G36710	-0.839334
							AT1G73880	-0.837576
							AT5G05270	-0.834219
							AT3G11820	-0.83151
							AT1G35720	-0.82593
							AT3G22740	-0.814404
							AT3G54510	-0.8016
							AT1G29690	-0.797535
							AT2G28510	-0.789544
							AT1G04540	-0.779253
							AT2G46600	-0.777763
							AT1G09070	-0.777095
							AT4G14560	-0.774395
							AT5G58430	-0.763774
							AT1G67970	-0.760027
							AT5G59450	-0.74803
							AT4G17230	-0.743004
							AT1G61660	-0.740968
							AT1G18265	-0.724112
							AT1G65510	-0.721936
							AT3G18610	-0.717946
							AT4G30370	-0.714247
							AT3G09390	-0.711637
							AT1G29290	-0.709434
							AT5G46780	-0.696116
							AT1G49780	-0.695651
							AT1G74100	-0.693316
							AT1G06450	-0.693109
							AT1G48320	-0.68475
							AT3G53230	-0.678652
							AT1G21050	-0.678616
							AT5G02480	-0.677469
							AT1G03730	-0.665678
							AT3G46930	-0.657126
							AT2G36890	-0.649704
							AT3G55730	-0.649268
							AT5G65310	-0.649039
							AT5G41100	-0.648892
							AT3G46620	-0.642601
							AT1G30810	-0.642069
							AT5G20910	-0.641038
							AT5G47960	-0.639588
							AT2G29740	-0.634833
							AT1G09940	-0.634068
							AT3G18830	-0.631174
							AT2G48010	-0.629507
							AT4G18880	-0.624209
							AT5G16360	-0.623558
							AT1G07520	-0.620764
							AT2G34090	-0.620432
							AT4G24480	-0.60691
							AT5G17190	-0.604355
							AT1G15430	-0.603206
							AT3G53990	-0.602343
							AT4G24160	-0.590357
							AT1G33970	-0.581273
							AT2G02860	-0.577179
							AT5G54960	-0.575311
							AT4G11600	-0.572257
							AT2G40840	-0.570675
							AT1G02860	-0.570253
							AT4G39570	-0.568212
							AT1G80610	-0.562204
							AT4G29440	-0.561354
							AT2G30870	-0.555329
							AT3G12490	-0.549189
							AT4G27970	-0.542339
							AT3G05500	-0.537324
							AT2G17840	-0.534659
							AT3G21220	-0.529733
							AT5G51630	-0.526971
							AT3G51000	-0.516179
							AT5G14930	-0.502513
							AT1G74340	-0.496925
							AT5G47880	-0.495513
							AT1G33590	-0.495196
							AT3G08710	-0.487649
							AT5G40540	-0.487006
							AT5G45100	-0.466182
							AT5G66420	-0.463307
							AT2G37110	-0.430787
							AT1G65820	-0.42424
							AT2G19450	-0.415687
							AT3G01650	-0.407338
							AT4G29040	-0.402221
							AT5G53570	-0.397726
							AT1G20630	-0.394129
							AT1G34260	-0.381822
							AT1G79550	-0.380426
							AT3G26240	-0.369572
							AT1G16470	-0.347307
							AT5G23540	-0.329812
							AT4G13360	-0.322717
							AT4G31160	-0.31039
							AT2G21270	-0.233605
